# Supplementary material for: Computational Modeling to Identify Drugs Targeting Metastatic Castration-Resistant Prostate Cancer Characterized by Heightened Glycolysis
Source: MDPI journal article supplement (doi:10.3390/ph17050569), 2024-04-29
Supplement: s1 [file s1]

# **Computational modeling to identify drugs targeting metastatic castration-resistant prostate cancer characterized by heightened glycolysis**

**Authors:** Mei-Chi Su<sup>1</sup>, Adam M. Lee<sup>1</sup>, Weijie Zhang<sup>2</sup>, Danielle Maeser<sup>2</sup>, Robert F. Gruener<sup>1</sup>, Yibin Deng<sup>3</sup>, R. Stephanie Huang<sup>1,2\*</sup>

## **Affiliations:**

1. Department of Experimental and Clinical Pharmacology, College of Pharmacy, University of Minnesota, Minneapolis, MN 55455, USA
2. Bioinformatics and Computational Biology, University of Minnesota, Minneapolis, MN 55455, USA
3. Department of Urology, Masonic Cancer Center, University of Minnesota Medical School, Minneapolis, Minnesota, USA

## **Addresses for Correspondence:**

R. Stephanie Huang, PhD  
Experimental and Clinical Pharmacology  
University of Minnesota College of Pharmacy  
B-138 Phillips-Wangensteen Building  
Minneapolis, MN 55455, United States  
Phone: 612-625-1372  
Email: rshuang@umn.edu

## **Sources of Funding:**

RSH received funding from NIH/NCI Grants R01CA204856, R01CA229618 and NCI Contract No. 75N91019D00024, Task Order No. 75N91020F00003. She also received funding from the University of Minnesota (UMN) OACA Faculty Research Development grant, a GIA award, a SURRGE award from the College of Pharmacy and a Masonic Cancer Center CRTI Exceptional Translational Research award.

**Disclosures:** The authors have no other relevant affiliations or financial involvement with any organization or entity with a financial interest in or financial conflict with the subject matter or materials discussed in the manuscript.

**Conflict of Interest Statement:** The authors declare no conflicts of interest.

**Table S1:** Finalized preliminary drug candidates list.

| <b>Name</b>                     | <b>Phase</b> | <b>MOA</b>                                                 | <b>category</b>           | <b>high_throughput_screening</b> |
|---------------------------------|--------------|------------------------------------------------------------|---------------------------|----------------------------------|
| <b>AZD5438</b>                  | Phase 1      | CDK inhibitor                                              | Drugs for high glycolysis | PRISM                            |
| <b>Birinapant</b>               | Phase 2      | XIAP inhibitor                                             | Dual effect drugs         | PRISM                            |
| <b>CNF-2024</b>                 | Phase 2      | HSP inhibitor                                              | Dual effect drugs         | PRISM                            |
| <b>Canertinib</b>               | Phase 3      | EGFR inhibitor                                             | Drugs for high glycolysis | PRISM                            |
| <b>Carmofur</b>                 | Launched     | thymidylate synthase inhibitor                             | Dual effect drugs         | PRISM                            |
| <b>DMH1</b>                     | Preclinical  | ALK tyrosine kinase receptor inhibitor                     | Dual effect drugs         | PRISM                            |
| <b>Darapladib</b>               | Phase 3      | phospholipase inhibitor                                    | Dual effect drugs         | PRISM                            |
| <b>Eltrombopag</b>              | Launched     | thrombopoietin receptor agonist                            | Dual effect drugs         | PRISM                            |
| <b>Exatecan-mesylate</b>        | Phase 3      | topoisomerase inhibitor                                    | Drugs for high glycolysis | PRISM                            |
| <b>FR-122047</b>                | Preclinical  | cyclooxygenase inhibitor                                   | Dual effect drugs         | PRISM                            |
| <b>Fenoprofen</b>               | Launched     | prostaglandin inhibitor                                    | Dual effect drugs         | PRISM                            |
| <b>GSK1070916</b>               | Phase 1      | Aurora kinase inhibitor                                    | Drugs for high glycolysis | PRISM                            |
| <b>GSK2141795</b>               | Phase 2      | AKT inhibitor                                              | Dual effect drugs         | PRISM                            |
| <b>Ganetespib</b>               | Phase 3      | HSP inhibitor                                              | Drugs for high glycolysis | PRISM                            |
| <b>HBX-41108</b>                | probe        | inhibitor of the deubiquitinase activity of USP7           | Drugs for high glycolysis | CTRP                             |
| <b>Indisulam</b>                | Phase 2      | CDK inhibitor                                              | Drugs for high glycolysis | PRISM                            |
| <b>Indisulam</b>                | Phase 2      | CDK inhibitor                                              | Dual effect drugs         | PRISM                            |
| <b>Ivermectin</b>               | Launched     | benzodiazepine receptor agonist                            | Dual effect drugs         | PRISM                            |
| <b>Nilotinib</b>                | Launched     | Abl kinase inhibitor, Bcr-Abl kinase inhibitor             | Dual effect drugs         | PRISM                            |
| <b>P276-00</b>                  | Phase 2      | CDK inhibitor                                              | Drugs for high glycolysis | PRISM                            |
| <b>P276-00</b>                  | Phase 2      | CDK inhibitor                                              | Dual effect drugs         | PRISM                            |
| <b>Papaverine-Hydrochloride</b> | Phase 2      | phosphodiesterases inhibitor and calcium channel inhibitor | Dual effect drugs         | PRISM                            |
| <b>Platin</b>                   | FDA          | DNA alkylator; organoplatinum reagent                      | Drugs for high glycolysis | CTRP                             |

|                  |             |                                                                  |                           |       |
|------------------|-------------|------------------------------------------------------------------|---------------------------|-------|
| <b>RS-67506</b>  | Preclinical | serotonin receptor partial agonist                               | Dual effect drugs         | PRISM |
| <b>Rapamycin</b> | Launched    | mTOR inhibitor                                                   | Dual effect drugs         | PRISM |
| <b>SB-431542</b> | probe       | inhibitor of the transforming growth factor beta type 1 receptor | Drugs for high glycolysis | CTRP  |
| <b>SNS-314</b>   | Phase 1     | Aurora kinase inhibitor                                          | Drugs for high glycolysis | PRISM |
| <b>SNS-314</b>   | Phase 1     | Aurora kinase inhibitor                                          | Dual effect drugs         | PRISM |
| <b>TU-2100</b>   | Phase 2     | anti-acne prodrug                                                | Dual effect drugs         | PRISM |
| <b>Torin-2</b>   | Preclinical | mTOR inhibitor                                                   | Drugs for high glycolysis | PRISM |
| <b>Torin-2</b>   | Preclinical | mTOR inhibitor                                                   | Dual effect drugs         | PRISM |
| <b>linifanib</b> | clinical    | inhibitor of VEGFRs                                              | Drugs for high glycolysis | CTRP  |
