# Supplementary material for: Computational Modeling to Identify Drugs Targeting Metastatic Castration-Resistant Prostate Cancer Characterized by Heightened Glycolysis
Source: Pharmaceuticals (Basel). 2024 Apr 29;17(5):569. doi: 10.3390/ph17050569 (PMC11124089; doi:10.3390/ph17050569)
Supplement: Supplementary file 1 [file pharmaceuticals-17-00569-s001.zip]

Archive with 4 entries (4 files):
- Supplementary Figures.pdf
- Supplementary Table S1.pdf
- Table S2. Patient features in the SU2C East Coast clinical study.csv
- Table S3. Patient features in the SU2C West Coast clinical study.csv
