# Supplementary material for: Computational Modeling to Identify Drugs Targeting Metastatic Castration-Resistant Prostate Cancer Characterized by Heightened Glycolysis
Source: Pharmaceuticals (Basel). 2024 Apr 29;17(5):569. doi: 10.3390/ph17050569 (PMC11124089; doi:10.3390/ph17050569)
Supplement: Supplementary file 1 [file pharmaceuticals-17-00569-s001.zip › Table S2. Patient features in the SU2C East Coast clinical study.csv]

	PATIENT_ID	CHEMO_REGIMEN_CATEGORY	AGE_AT_DIAGNOSIS	SEX	PSA	OS_STATUS	OS_MONTHS
1	1115015	abiraterone+Dutasteride	71	Male	1252		NA
2	1115016	abiraterone+Dutasteride	83.1	Male	46.21	1:DECEASED	11.99080158
3	1115019	Standard of care abiraterone	54	Male	0.8	1:DECEASED	3.153745072
4	1115020	Standard of care enzalutamide	53.7	Male	10.7	1:DECEASED	8.442838371
5	1115021	Standard of care enzalutamide	50.8	Male	878		NA
6	1115082	abiraterone+Dutasteride	61	Male			NA
7	1115083	abiraterone+Dutasteride	58.8	Male			NA
8	1115085	abiraterone+Dutasteride	69.1	Male			NA
9	1115087	abiraterone+Dutasteride	61.1	Male			NA
10	1115089	abiraterone+Dutasteride	64.5	Male			NA
11	1115090	abiraterone+Dutasteride	64.1	Male	112.89		NA
12	1115091	abiraterone+Dutasteride	63.8	Male			NA
13	1115092	abiraterone+Dutasteride	69.5	Male			NA
14	1115093	abiraterone+Dutasteride	58.8	Male	299.8	1:DECEASED	28.8107753
15	1115150	Trial 2 abiraterone +/- ARN509 (+ARN509)	67.7	Male	228.75		NA
16	1115153	Enzalutamide with Correlative Assessments	39.6	Male			NA
17	1115154	Standard of care enzalutamide	44.6	Male	8.9		NA
18	1115156	Enzalutamide with Correlative Assessments	NA	Male		1:DECEASED	29.82917214
19	1115157	Enzalutamide with Correlative Assessments	NA	Male	5.5		NA
20	1115161	Enzalutamide with Correlative Assessments	65	Male	1000	1:DECEASED	4.533508541
21	1115183	Trial 2 abiraterone +/- ARN509 (+ARN509)	NA	Male	5.7	1:DECEASED	22.99605782
22	1115190	abiraterone+Dutasteride	59.7	Male			NA
23	1115200	Enzalutamide with Correlative Assessments	NA	Male	9.6		NA
24	1115202	Trial 2 abiraterone +/- ARN509 (+ARN509)	NA	Male	15	0:LIVING	28.31800263
25	1115244	Enzalutamide with Correlative Assessments	62.9	Male	1713		NA
26	1115245	Standard of care enzalutamide	58.9	Male	166		NA
27	1115249	Enzalutamide with Correlative Assessments	71.3	Male	183		NA
28	1115257	Enzalutamide with Correlative Assessments	55.9	Male	3118		NA
29	1115263	Abiraterone no steroids	69	Male	288	0:LIVING	16.59001314
30	1115264	Abiraterone no steroids	67.1	Male	4.7	1:DECEASED	26.1826544
31	1115265	Enzalutamide with Correlative Assessments	76.3	Male	13.4	1:DECEASED	14.29040736
32	1115284	Enzalutamide with Correlative Assessments	73	Male	46	1:DECEASED	20.56504599
33	1115303	abiraterone+Dutasteride	61.7	Male			NA
34	1115304	abiraterone+Dutasteride	62.6	Male			NA
35	1115305	abiraterone+Dutasteride	55.8	Male		0:LIVING	44.18528252
36	1115306	abiraterone+Dutasteride	65.8	Male			NA
37	1115307	abiraterone+Dutasteride	68.3	Male		1:DECEASED	33.8370565
38	1115308	abiraterone+Dutasteride	53.1	Male		1:DECEASED	68.98817346
39	1115309	abiraterone+Dutasteride	57.1	Male	14.5		NA
40	1115310	abiraterone+Dutasteride	59.1	Male		1:DECEASED	29.66491459
41	1115311	abiraterone+Dutasteride	59.5	Male		0:LIVING	33.8370565
42	1115312	abiraterone+Dutasteride	55.9	Male			NA
43	1115313	abiraterone+Dutasteride	60.8	Male		0:LIVING	52.46386334
44	1115314	abiraterone+Dutasteride	52.3	Male	7.58		NA
45	1115342	Enzalutamide with Correlative Assessments	64	Male	3.64	1:DECEASED	37.91064389
46	1115343	Enzalutamide with Correlative Assessments	64.7	Male	15.3		NA
47	1115362	Enzalutamide with Correlative Assessments	70.7	Male	10.9	0:LIVING	20.17082786
48	1115372	Enzalutamide with Correlative Assessments	55.4	Male	3.7	1:DECEASED	23.06176084
49	1115378	Other: Carbo/Taxol	67.2	Male	9.02		NA
50	1115442	Abiraterone no steroids	60.3	Male	1.53	0:LIVING	22.07621551
51	1115444	Enzalutamide with Correlative Assessments	61.2	Male	47.8	1:DECEASED	17.70696452
52	1115463	Standard of care enzalutamide	58.8	Male	6		NA
53	1115466	Abiraterone no steroids	58.1	Male	8.57		NA
54	1115467	Enzalutamide with Correlative Assessments	57.6	Male		0:LIVING	19.48094612
55	1115468	Standard of care enzalutamide	73.1	Male	47	1:DECEASED	9.986859396
56	1115503	Enzalutamide with Correlative Assessments	60.7	Male			NA
57	1115525	Standard of care abiraterone	60.8	Male	10		NA
58	1115526	Enzalutamide with Correlative Assessments	65.5	Male	3.71	0:LIVING	24.83574244
59	1115527	Alliance (Arm B-enzalutamide + abiraterone)	56.6	Male	320.2		NA
60	1115531	Enzalutamide with Correlative Assessments	55.5	Male	3.4		NA
61	1115544	Abiraterone no steroids	62.1	Male	57.07		NA
62	1115549	Enzalutamide with Correlative Assessments	54.5	Male	4.4	0:LIVING	7.424441524
63	1115550	Abiraterone no steroids	56.4	Male	13.6	0:LIVING	1.839684625
64	1115554	Abiraterone no steroids	56.3	Male	45.4	1:DECEASED	15.17739816
65	1115556	Standard of care enzalutamide	69.5	Male			NA
66	1115569	Radium-223 (Xofigo)	48.8	Male	52.84		NA
67	1115574	Abiraterone no steroids	46.8	Male	4.9		NA
68	1115576	Standard of care abiraterone	64.7	Male	5.28		NA
69	1115577	Standard of care enzalutamide	59.8	Male	18.88		NA
70	1115578	Enzalutamide with Correlative Assessments	64.8	Male	2.6		NA
71	1115581	Standard of care enzalutamide	62.6	Male	18		NA
72	5115022	Standard of care enzalutamide	44.5	Male	1049.6		NA
73	5115023	Standard of care abiraterone	64.6	Male	7.2		NA
74	5115024	Other:Docetaxel	60.7	Male	6.6		NA
75	5115026	Trial 1 abiraterone +/- ABT888 (+ABT)	50.5	Male	23.6		NA
76	5115027	Screen Failure	44.8	Male	9.1		NA
77	5115028	Other: Docetaxel	49.2	Male	2.8		NA
78	5115029	Standard of care abiraterone	58.2	Male			NA
79	5115030	Trial 1 abiraterone +/- ABT888 (+ABT)	63.1	Male		0:LIVING	1.67542707
80	5115031	Standard of care abiraterone	66.2	Male	2.4	0:LIVING	20.20367937
81	5115032	Other: Cabo in CRPC	69.8	Male	48.6		NA
82	5115033	Trial 1 abiraterone +/- ABT888 (abi only)	66.7	Male	203.8		NA
83	5115034	Other: Cabo in CRPC	56	Male	2.8	1:DECEASED	17.67411301
84	5115057	Trial 1 abiraterone +/- ABT888 (+ABT)	58.7	Male	9.63		NA
85	5115058	Trial 1 abiraterone +/- ABT888 (+ABT)	42.3	Male		1:DECEASED	13.14060447
86	5115073	Standard of care enzalutamide	53.4	Male	4.4		NA
87	5115075	Standard of care abiraterone	59.7	Male	7.7	1:DECEASED	10.74244415
88	5115076	Standard of care abiraterone	52.5	Male	19.3		NA
89	5115077	Standard of care enzalutamide	52.4	Male	56.2		NA
90	5115078	Standard of care enzalutamide	59.7	Male	15		NA
91	5115098	Other: Cabozantinib	57.4	Male			NA
92	5115127	Standard of care abiraterone	51.5	Male	467		NA
93	5115128	Trial 1 abiraterone +/- ABT888 (+ABT)	55.7	Male	20	1:DECEASED	39.32325887
94	5115129	Trial 1 abiraterone +/- ABT888 (+ABT)	70	Male	3.75	1:DECEASED	9.231274639
95	5115130	Trial 1 abiraterone +/- ABT888 (+ABT)	67.1	Male		0:LIVING	36.56373193
96	5115152	Other: PSMA ADC	41.2	Male	18.1		NA
97	5115158	Standard of care abiraterone	53.9	Male	5.5		NA
98	5115160	Trial 1 abiraterone +/- ABT888 (+ABT)	74.6	Male	45.4	1:DECEASED	4.270696452
99	5115186	Trial 1 abiraterone +/- ABT888 (abi only)	55.2	Male		0:LIVING	8.278580815
100	5115187	Trial 1 abiraterone +/- ABT888 (+ABT)	47.1	Male	15.7		NA
101	5115193	Other: Docetaxel	67.8	Male	8.5		NA
102	5115194	Other: CC115	50.1	Male	362.7		NA
103	5115195	Other: PSMA ADC	60.7	Male	4.86		NA
104	5115196	Standard of care abiraterone	56.4	Male	28.1		NA
105	5115197	Other: Docetaxel	50.3	Male			NA
106	5115198	Other: PSMA-ADC	55.1	Male	24.5		NA
107	5115199	N/E	49.7	Male	15.93		NA
108	5115203	Trial 1 abiraterone +/- ABT888 (+ABT)	65.9	Male	16.3	1:DECEASED	12.87779238
109	5115254	Trial 1 abiraterone +/- ABT888 (+ABT)	67.3	Male	6	0:LIVING	11.89224704
110	5115255	Trial 1 abiraterone +/- ABT888 (+ABT)	60.6	Male	11.66	1:DECEASED	14.84888305
111	5115256	Other: Cabazitaxel	54.8	Male	4.7		NA
112	5115258	Other: Carboplatin+Etopside	69.5	Male	8.14		NA
113	5115259	Standard of care enzalutamide	63.7	Male	320		NA
114	5115260	Standard of care abiraterone	57.6	Male		0:LIVING	6.504599212
115	5115261	Standard of care abiraterone	45.8	Male	3.2		NA
116	5115276	Trial 1 abiraterone +/- ABT888 (abi only)	70.7	Male	29.4	1:DECEASED	6.044678055
117	5115290	Other: Docetaxel	77.1	Male	19		NA
118	5115291	Trial 1 abiraterone +/- ABT888 (+ABT)	59.9	Male			NA
119	5115327	Trial 1 abiraterone +/- ABT888 (abi only)	62.5	Male	23	0:LIVING	13.92904074
120	5115359	Standard of care abiraterone	63.4	Male	34.7	1:DECEASED	2.923784494
121	5115405	Trial 1 abiraterone +/- ABT888 (abi only)	63.4	Male	24.37	0:LIVING	10.5781866
122	5115406	Standard of care enzalutamide	59.6	Male	52.7		NA
123	5115407	Enzalutamide with Correlative Assessments	54	Male	5.26		NA
124	5115408	Trial 1 abiraterone +/- ABT888 (+ABT)	57.2	Male	46.74	0:LIVING	22.01051248
125	5115409	Trial 1 abiraterone +/- ABT888 (+ABT)	NA	Male		0:LIVING	11.66228647
126	5115410	Trial 1 abiraterone +/- ABT888 (+ABT)	NA	Male		0:LIVING	2.726675427
127	5115411	N/E	NA	Male			NA
128	5115412	Trial 1 abiraterone +/- ABT888 (+ABT)	58.2	Male	29.36	0:LIVING	6.73455979
129	5115501	N/E	61.5	Male	4.8		NA
130	5115505	N/E	NA	Male			NA
131	5115506	Trial 1 abiraterone +/- ABT888 (+ABT)	NA	Male			NA
132	5115528	Other: Docetaxel	63	Male	3.5		NA
133	5115545	Other: UNK	NA	Male			NA
134	5115546	Other: Bicalutamide	NA	Male			NA
135	5115547	Other: Cabozantinib	NA	Male			NA
136	5115548	Other	NA	Male			NA
137	5115608	Other: DLL4/VEGF antibody OMP-305B83	NA	Male			NA
138	5115609	Standard of care abiraterone	NA	Male		0:LIVING	1.97109067
139	5115610	Standard of care abiraterone	NA	Male		0:LIVING	9.921156373
140	5115611	Other: Docetaxel	NA	Male			NA
141	5115612	Other	NA	Male			NA
142	5115613	Standard of care abiraterone	NA	Male			NA
143	5115614	Standard of care abiraterone	NA	Male			NA
144	5115615	Standard of care abiraterone	NA	Male		1:DECEASED	10.34822602
145	5115648	Standard of care abiraterone	NA	Male			NA
146	5115650	Standard of care abiraterone	NA	Male		1:DECEASED	5.880420499
147	5115651	Other: Casodex	NA	Male			NA
148	6115012	Other: Taxol	64.1	Male	27.4		NA
149	6115013	Standard of care abiraterone	50.1	Male	20		NA
150	6115014	Other: Post Abiraterone Acetate vs. Placebo	61.1	Male	8.3		NA
151	6115114	Standard of care abiraterone	59.3	Male	0.6	1:DECEASED	16.42575558
152	6115115	Standard of care enzalutamide	71.6	Male	4.1		NA
153	6115116	Standard of care enzalutamide	NA	Male	0.2	1:DECEASED	2.759526938
154	6115117	Standard of care enzalutamide	55.1	Male	6.5		NA
155	6115118	Standard of care abiraterone	65.6	Male	6.5		NA
156	6115119	Standard of care enzalutamide	66	Male	5.6		NA
157	6115120	Standard of care abiraterone	63.6	Male	28.4	1:DECEASED	16.62286465
158	6115121	Standard of care enzalutamide	49.8	Male	8	1:DECEASED	20.72930355
159	6115122	Standard of care abiraterone	53	Male	33.5		NA
160	6115123	Standard of care enzalutamide	53.8	Male	57		NA
161	6115124	Other: Abiraterone acetate + ipilimumab	69.1	Male	5.2	0:LIVING	35.8738502
162	6115219	ARN509	55.2	Male	2.5		NA
163	6115224	Standard of care abiraterone	71.8	Male	5.7		NA
164	6115227	Other: Enzalutamide + Docetaxel	62.9	Male	28		NA
165	6115233	Standard of care abiraterone	67.3	Male	>10		NA
166	6115234	Standard of care enzalutamide	56.3	Male	10.3	0:LIVING	32.81865966
167	6115235	Standard of care enzalutamide	59.3	Male	5.3	0:LIVING	34.55978975
168	6115236	Other: Casodex	68.2	Male	14.1	1:DECEASED	3.94218134
169	6115237	Other: carbo + etoposide	NA	Male	<0.05		NA
170	6115242	Standard of care abiraterone	64.5	Male	32.67	1:DECEASED	17.57555848
171	6115247	Standard of care abiraterone	50.6	Male	5.2	1:DECEASED	44.05387648
172	6115250	ARN509	64.3	Male	256.04		NA
173	6115251	Standard of care enzalutamide	69	Male	53.6	1:DECEASED	3.64651774
174	6115285	Standard of care enzalutamide	64.2	Male	24.43		NA
175	6115286	Standard of care abiraterone	66	Male	4.58		NA
176	6115288	Alliance (Arm A- enzalutamide only)	54.9	Male	159.28	0:LIVING	16.03153745
177	6115295	Standard of care abiraterone	44.9	Male	12.13		NA
178	6115296	Standard of care enzalutamide	65.8	Male	3.7		NA
179	6115317	Standard of care abiraterone	55.2	Male	4.9		NA
180	6115319	Standard of care abiraterone	85.7	Male	29		NA
181	6115320	Other: Casodex	63.8	Male	81.21		NA
182	6115321	Standard of care abiraterone	64.5	Male			NA
183	6115322	Alliance (Arm A- enzalutamide only)	NA	Male	13.73	0:LIVING	14.48751643
184	6115323	Standard of care enzalutamide	64	Male	10	1:DECEASED	4.270696452
185	6115381	Other: Carbo + docetaxel	52.2	Male	4.2		NA
186	6115382	Standard of care enzalutamide	59.3	Male	5.9		NA
187	6115383	Alliance (Arm B-enzalutamide + abiraterone)	58.2	Male		1:DECEASED	29.66491459
188	6115385	Standard of care abiraterone	59.7	Male	219.19		NA
189	6115386	Trial 3 post-abiraterone ARN 509 + everolimus	50.6	Male	7		NA
190	6115387	Standard of care enzalutamide	73.9	Male	9.89		NA
191	6115388	Other: Post-Docetaxel	72.8	Male	2.9		NA
192	6115389	Standard of care abiraterone	78.7	Male	97.3		NA
193	6115390	Standard of care enzalutamide	54.3	Male	9.6		NA
194	6115391	Standard of care abiraterone	57.9	Male	5.595		NA
195	6115392	AbiCabazi (Arm 1- abiraterone alone)	60.7	Male	4.9	1:DECEASED	9.00131406
196	6115393	Standard of care abiraterone	65	Male	7.54		NA
197	6115394	Other: Abiraterone acetate + ipilimumab	64.1	Male	14.01		NA
198	6115395	Standard of care abiraterone	58.9	Male	90.9	0:LIVING	35.24967148
199	6115396	Trial 3 post-abiraterone ARN 509 + everolimus	53.2	Male	9.47		NA
200	6115397	Standard of care abiraterone	NA	Male	11.31		NA
201	6115398	Standard of care abiraterone	75.1	Male	19.6		NA
202	6115399	AbiCabazi (Arm 1- abiraterone alone)	53.4	Male		0:LIVING	25.49277267
203	6115400	Other: MLN0128 (mTORi)	62.7	Male	14.04		NA
204	6115401	AbiCabazi (Arm 1- abiraterone alone)	84.4	Male	18.85		NA
205	6115402	Standard of care abiraterone	NA	Male	16,275.14		NA
206	6115403	Other: MLN0128 (mTORi)	61.6	Male	31.7		NA
207	6115427	Trial 3 post-abiraterone ARN 509 + everolimus	55.6	Male	4		NA
208	6115590	Alliance (Arm A-enzalutamide only)	NA	Male	4.4	0:LIVING	33.47568988
209	6115592	Standard of care abiraterone	NA	Male	6.5		NA
210	6115593	Standard of care abiraterone	NA	Male	3.77		NA
211	6115594	Standard of care enzalutamide	NA	Male	182.7	1:DECEASED	32.12877792
212	6115595	Abiraterone no steroids	NA	Male		1:DECEASED	29.50065703
213	6115596	Trial 3 post-abiraterone ARN 509 + everolimus	NA	Male			NA
214	6115597	Trial 2 abiraterone +/- ARN509 (+ARN509)	NA	Male	12.57		NA
215	6115598	Other: VT-464	53.6	Male	8		NA
216	6115599	Trial 3 post-abiraterone ARN 509 + everolimus	NA	Male	6.4		NA
217	6115600	Alliance (Arm B-enzalutamide+abiraterone)	NA	Male	10.49		NA
218	6115601	Standard of care enzalutamide	NA	Male	10.4		NA
219	6115603	Other: VT-464	NA	Male	9.89		NA
220	6115604	Alliance (Arm A-enzalutamide only)	NA	Male	1.82		NA
221	6115605	Trial 2 abiraterone +/- ARN509 (Abi only)	NA	Male	28.5	1:DECEASED	14.15900131
222	9115035	Screen Failure	NA	Male			NA
223	9115036	Screen Failure	NA	Male			NA
224	9115037	Screen Failure	NA	Male			NA
225	9115040	Standard of care abiraterone	42.6	Male	39		NA
226	9115041	Standard of care enzalutamide	60.4	Male			NA
227	9115042	abiraterone+Dutasteride	49.7	Male			NA
228	9115045	abiraterone+Dutasteride	74.9	Male	>10		NA
229	9115046	other - hospice	67.1	Male	0.68		NA
230	9115047	pharmacodynamic abiraterone	67.1	Male	298	1:DECEASED	41.22864652
231	9115048	Standard of care enzalutamide	68.7	Male	4.4		NA
232	9115049	Standard of care abiraterone	53	Male	4.08		NA
233	9115050	Standard of care enzalutamide	61.2	Male	9.3		NA
234	9115051	Standard of care abiraterone	66.4	Male	5.5	1:DECEASED	29.4021025
235	9115052	pharmacodynamic abiraterone	62.5	Male	5.2		NA
236	9115055	Other: Docetaxel	65.2	Male	57.9		NA
237	9115059	Standard of care abiraterone	49.3	Male	2	1:DECEASED	30.71616294
238	9115060	Pharmacodynamic abiraterone	62	Male	182	0:LIVING	24.83574244
239	9115061	Other: surveillance	65	Male	20		NA
240	9115062	Other: Ketoconazole	60.8	Male	16		NA
241	9115063	pharmacodynamic abiraterone	69.2	Male	10		NA
242	9115064	pharmacodynamic abiraterone	59.1	Male	1915.08		NA
243	9115065	pharmacodynamic abiraterone	68.6	Male	54.71	1:DECEASED	33.08147175
244	9115066	Other: Docetaxel	64.9	Male	28.7		NA
245	9115067	pharmacodynamic abiraterone	71.2	Male	446.5	1:DECEASED	28.05519054
246	9115068	Standard of care enzalutamide	64.4	Male	2.4		NA
247	9115069	pharmacodynamic abiraterone	62.9	Male	50.7	1:DECEASED	22.20762155
248	9115070	Standard of care abiraterone	63.5	Male	325.58	1:DECEASED	23.39027595
249	9115102	abiraterone+Dutasteride	58.9	Male	8.22	1:DECEASED	47.76609724
250	9115104	Trial 1 abiraterone +/- ABT888 (+ABT)	52.6	Male		0:LIVING	2.431011827
251	9115107	Standard of care abiraterone	71.4	Male	185		NA
252	9115108	pharmacodynamic abiraterone	NA	Male	46	1:DECEASED	18.72536137
253	9115109	Standard of care abiraterone	54.5	Male	13.4	1:DECEASED	12.81208936
254	9115111	Trial 1 abiraterone +/- ABT888 (+ABT)	72.2	Male	1.5	1:DECEASED	33.73850197
255	9115171	pharmacodynamic abiraterone	68.1	Male	31.9		NA
256	9115173	pharmacodynamic abiraterone	42.5	Male	120.58	0:LIVING	23.32457293
257	9115174	pharmacodynamic abiraterone	75.9	Male	85.5	1:DECEASED	25.62417871
258	9115175	pharmacodynamic abiraterone	69.8	Male	184	1:DECEASED	22.14191853
259	9115180	Trial 1 abiraterone +/- ABT888 (+ABT)	68.3	Male	10		NA
260	9115181	Trial 1 abiraterone +/- ABT888 (abi only)	61.5	Male	30	1:DECEASED	28.87647832
261	9115182	Trial 1 abiraterone +/- ABT888 (abi only)	64.8	Male	8.59	1:DECEASED	45.03942181
262	9115184	Standard of care abiraterone	62	Male	851.98		NA
263	9115185	Standard of care enzalutamide	62	Male	14		NA
264	9115324	pharmacodynamic abiraterone	72.5	Male	41.97	1:DECEASED	12.25361367
265	9115325	pharmacodynamic abiraterone	48.1	Male	57	1:DECEASED	17.60840999
266	9115338	Standard of care enzalutamide	52.5	Male		1:DECEASED	33.01576873
267	9115339	Standard of care abiraterone	69.2	Male	2	1:DECEASED	12.02365309
268	9115340	Standard of care enzalutamide	60.8	Male	95		NA
269	9115341	Trial 1 abiraterone +/- ABT888 (+ABT)	60.5	Male	2.1	1:DECEASED	20.72930355
270	9115415	pharmacodynamic abiraterone	75.2	Male	58.2		NA
271	9115416	pharmacodynamic abiraterone	41.6	Male	38.9	1:DECEASED	28.48226018
272	9115418	Standard of care enzalutamide	63.8	Male	13		NA
273	9115420	Standard of care enzalutamide	59.3	Male	222		NA
274	9115422	Standard of care abiraterone	63.9	Male	5.1	1:DECEASED	31.53745072
275	9115423	Standard of care enzalutamide	45.8	Male	410		NA
276	9115425	Standard of care abiraterone	61	Male	28	0:LIVING	17.83837057
277	9115515	Standard of care enzalutamide	75.5	Male	50		NA
278	9115516	Standard of care enzalutamide	60.3	Male	4.3		NA
279	9115517	Standard of care abiraterone	68.3	Male	11	1:DECEASED	12.12220762
280	9115519	Standard of care enzalutamide	63.9	Male	5		NA
281	9115520	Standard of care enzalutamide	53.2	Male	3.7		NA
282	9115521	Standard of care enzalutamide	64.3	Male	13		NA
283	9115522	Standard of care abiraterone	58.7	Male	20	0:LIVING	10.5781866
284	9115524	Standard of care enzalutamide	54.7	Male	2150	1:DECEASED	3.515111695
285	9115538	pharmacodynamic abiraterone	58.3	Male	1200		NA
286	9115539	Standard of care abiraterone	64.7	Male	16	1:DECEASED	18.42969777
287	9115540	Standard of care enzalutamide	54.5	Male	3.3		NA
288	9115541	Standard of care abiraterone	69.1	Male	0.95		NA
289	9115551	pharmacodynamic abiraterone	73	Male	21.9	0:LIVING	16.52431012
290	9115552	pharmacodynamic abiraterone	54.2	Male	104.7	0:LIVING	6.373193167
291	9115553	pharmacodynamic abiraterone	62.3	Male	306.3		NA
292	9115555	Standard of care enzalutamide	66.5	Male	13.8	0:LIVING	4.566360053
293	9115566	pharmacodynamic abiraterone	63.2	Male	80	1:DECEASED	23.32457293
294	9115567	Standard of care enzalutamide	55.7	Male	8.3		NA
295	9115568	Standard of care enzalutamide	61.4	Male	8.8		NA
296	9115570	Enzalutamide with Correlative Assessments	61.2	Male		0:LIVING	25
297	9115571	pharmacodynamic abiraterone	56.9	Male	380		NA
298	9115572	Standard of care abiraterone	64.4	Male	177	1:DECEASED	18.13403417
299	9115575	Standard of care enzalutamide	55.5	Male	55	0:LIVING	26.70827858
300	9115580	Standard of care abiraterone	53.3	Male	23		NA
301	9115585	Standard of care enzalutamide	63.8	Male	16.1		NA
302	9115586	Standard of care abiraterone	65.3	Male	190	1:DECEASED	15.37450723
303	13115262	Other: Provenge	59.3	Male	80		NA
304	13115277	Other: Cabo in CRPC	54.4	Male	7.1		NA
305	13115379	Other: Provenge	43.6	Male	15.4		NA
306	13115404	Other: BAY1161909, paclitaxel	50.5	Male			NA
307	13115443	Other: Bicalutamide	55	Male	410.55		NA
308	13115464	Other: Provenge	50.8	Male	6.6		NA
309	13115465	Standard of care abiraterone	58	Male	4.6	0:LIVING	27.10249671
310	96115135	Standard of care abiraterone	62.1	Male	19.87	1:DECEASED	57.26018397
311	96115137	Standard of care enzalutamide	71.5	Male	4.1		NA
312	96115138	Standard of care abiraterone	65.4	Male	18		NA
313	96115139	Standard of care abiraterone	58.8	Male	26		NA
314	96115140	Standard of care abiraterone	89	Male	53.6	1:DECEASED	20.86070959
315	96115141	Standard of care abiraterone	60.5	Male	1.8		NA
316	96115142	Standard of care enzalutamide	59.1	Male	5.2		NA
317	96115143	MLN8237	84	Male	12		NA
318	96115144	MLN8237	53.7	Male			NA
319	96115145	MLN8237	70.3	Male	16		NA
320	96115146	MLN8237	75.7	Male	9.8		NA
321	96115163	Standard of care abiraterone	62.7	Male	15.84		NA
322	96115164	MLN8237	78.7	Male	1.9		NA
323	96115165	MLN8237	86.1	Male	0.9		NA
324	96115204	Standard of care enzalutamide	72.1	Male	20		NA
325	96115206	MLN8237	61.2	Male	2.5		NA
326	96115207	Standard of care enzalutamide	54.5	Male	7	0:LIVING	30.5847569
327	96115208	Standard of care abiraterone	62.2	Male	1000		NA
328	96115209	Standard of care abiraterone	56.9	Male	19		NA
329	96115210	Standard of care abiraterone	64.2	Male	141		NA
330	96115211	Standard of care abiraterone	66.5	Male	6.5		NA
331	96115213	Standard of care abiraterone	64.4	Male	7.4		NA
332	96115214	Standard of care abiraterone	80.3	Male	6		NA
333	96115215	Standard of care enzalutamide	55.8	Male	11		NA
334	96115266	Standard of care abiraterone	66.9	Male	968.7		NA
335	96115269	Standard of care abiraterone	64.4	Male	2.3		NA
336	96115272	MLN8237	62.3	Male	1.5		NA
337	96115273	MLN8237	58.4	Male			NA
338	96115274	MLN8237	66.5	Male	57.9		NA
339	96115275	MLN8237	59.9	Male	3.3		NA
340	96115292	MLN8237	67.3	Male	19.69		NA
341	96115294	MLN8237	62.7	Male	15.8		NA
342	96115472	Standard of care enzalutamide	57.4	Male	75	0:LIVING	32.78580815
343	96115473	Standard of care enzalutamide	58.1	Male	4.3	0:LIVING	29.66491459
344	96115474	Standard of care enzalutamide	57.4	Male	8.6		NA
345	96115475	Standard of care abiraterone	60.4	Male	8		NA
346	96115476	Standard of care abiraterone	65.6	Male			NA
347	96115479	MLN8237	67.2	Male	104.82		NA
348	96115480	MLN8237	67	Male	4.5		NA
349	96115482	MLN8237	56.5	Male	17		NA
350	96115485	MLN8237	67	Male	512.6		NA
351	96115487	MLN8237	52.8	Male	47.6		NA
352	96115489	MLN8237	62.6	Male	6.6		NA
353	96115490	Other: carbo/etoposide	39.7	Male			NA
354	96115491	MLN8237	60.7	Male	10		NA
355	96115493	MLN8237	57.2	Male	9		NA
356	96115494	Other: Abiraterone +/- GDC0068/Placebo	62.8	Male	8.22		NA
357	96115495	Standard of care enzalutamide	49.3	Male			NA
358	96115496	Standard of care enzalutamide	62	Male	8.568		NA
359	96115497	Standard of care enzalutamide	49.7	Male		0:LIVING	8.311432326
360	96115498	Standard of care enzalutamide	49.3	Male	2.8	0:LIVING	28.35085414
361	96115500	Standard of care enzalutamide	52.1	Male	3.7		NA
362	96115508	MLN8237	58.8	Male	9.5		NA
363	96115509	MLN8237	57.9	Male			NA
364	96115513	Standard of care abiraterone	66.9	Male	4.3	1:DECEASED	16.62286465
365	96115616	MLN8237	58.8	Male	6.9		NA
366	96115617	MLN8237	66.9	Male	1.15		NA
367	96115619	MLN8237	58.7	Male	8.24		NA
368	96115622	MLN8237	67.3	Male	0.44		NA
369	96115623	MLN8237	65.9	Male	28.4		NA
370	96115624	MLN8237	60.6	Male	11.1		NA
371	96115626	MLN8237	67.4	Male	0.8		NA
372	96115629	MLN8237	64.5	Male	72.84		NA
373	96115630	MLN8237	61.3	Male	10.7		NA
374	96115631	MLN8237	64.3	Male	26.4		NA
375	96115638	MLN8237	62.2	Male	6.3		NA
376	96115639	MLN8237	56.4	Male	4.61	1:DECEASED	8.935611038
377	96115640	MLN8237	62.6	Male	4.38		NA
378	96115641	MLN8237	65.5	Male	92		NA
379	96115642	MLN8237	63.3	Male	67		NA
380	96115643	MLN8237	67.7	Male	5.16		NA
381	96115645	Standard of care enzalutamide	64.4	Male	4.2		NA
382	96115646	MLN8237	67.2	Male	2.626		NA
383	97115001	Standard of care abiraterone	57.5	Male	4.7		NA
384	97115002	Other: Bicalutamide	68.3	Male			NA
385	97115003	Standard of care abiraterone	59.9	Male	21		NA
386	97115005	Standard of care abiraterone	57.3	Male	137		NA
387	97115006	Other: Bicalutamide	38.6	Male	57		NA
388	97115007	Trial 4 post-abiraterone Olaparib	64.3	Male	10		NA
389	97115009	Standard of care abiraterone	71.3	Male	>1000		NA
390	97115071	Trial 4 post-abiraterone Olaparib	60.6	Male	2800		NA
391	97115074	Standard of care abiraterone	68.4	Male	100.9		NA
392	97115079	Olaparib	68.4	Male	2.2		NA
393	97115095	Trial 4 post-abiraterone Olaparib	62.8	Male	32		NA
394	97115125	Standard of care abiraterone	55	Male	17	0:LIVING	3.94218134
395	97115131	Trial 4 post-abiraterone Olaparib	50.7	Male	190		NA
396	97115147	Trial 4 post-abiraterone Olaparib	66.4	Male	100.9		NA
397	97115148	Trial 4 post-abiraterone Olaparib	49.7	Male	42		NA
398	97115151	Standard of care abiraterone	58.6	Male	28.7		NA
399	97115166	Trial 4 post-abiraterone Olaparib	53.4	Male	13		NA
400	97115167	Trial 4 post-abiraterone Olaparib	61.4	Male	>2000		NA
401	97115188	Trial 4 post-abiraterone Olaparib	65.3	Male	400		NA
402	97115278	Trial 4 post-abiraterone Olaparib	55.2	Male	166		NA
403	97115280	Standard of care enzalutamide	80.6	Male	160		NA
404	97115281	Trial 4 post-abiraterone Olaparib	67.3	Male	152		NA
405	97115315	Olaparib	68	Male	152		NA
406	97115316	Olaparib	64.1	Male	43		NA
407	97115330	Trial 4 post-abiraterone Olaparib	60	Male	8.7		NA
408	97115331	Trial 4 post-abiraterone Olaparib	61.5	Male	14		NA
409	97115333	Olaparib	67.3	Male	766		NA
410	97115335	Trial 4 post-abiraterone Olaparib	59.3	Male	43		NA
411	97115337	Trial 4 post-abiraterone Olaparib	49.3	Male			NA
412	97115358	Trial 4 post-abiraterone Olaparib	52.5	Male			NA
413	97115363	Standard of care enzalutamide	53.1	Male	20.8	0:LIVING	20.17082786
414	97115365	Standard of care enzalutamide	47.2	Male	11.24		NA
415	97115368	Standard of care enzalutamide	54.4	Male	27	0:LIVING	30.38764783
416	97115374	N/E	NA	Male			NA
417	97115375	N/E	NA	Male			NA
418	97115376	N/E	NA	Male			NA
419	97115447	Standard of care abiraterone	52.6	Male	45		NA
420	97115448	Standard of care abiraterone	75.1	Male	180		NA
421	97115449	Standard of care abiraterone	71.1	Male	4,005		NA
422	97115453	Standard of care enzalutamide	73.3	Male			NA
423	97115454	Standard of care enzalutamide	66.9	Male	95		NA
424	97115456	Olaparib	61.5	Male	9.1		NA
425	97115558	Other: Cabazitaxel	60.7	Male	70		NA
426	97115560	Other: Cabazitaxel	57.1	Male	13		NA
427	97115561	Standard of care enzalutamide	64	Male			NA
428	97115563	Standard of care abiraterone	60.9	Male	75.5		NA
429	97115564	Standard of care abiraterone	60.1	Male	105.7		NA
