# Supplementary material for: Computational Modeling to Identify Drugs Targeting Metastatic Castration-Resistant Prostate Cancer Characterized by Heightened Glycolysis
Source: Pharmaceuticals (Basel). 2024 Apr 29;17(5):569. doi: 10.3390/ph17050569 (PMC11124089; doi:10.3390/ph17050569)
Supplement: Supplementary file 1 [file pharmaceuticals-17-00569-s001.zip › Table S3. Patient features in the SU2C West Coast clinical study.csv]

	Patient.ID	Death.or.Last.Contact	Event	OS.mCRPC	Enzalutamide	Duration of enza treatment	Disease.Site	ECOG.PS	PSA.At.Biopsy	LDH.at.biopsy	ALP	Hemoglobin.at.biopsy	Abiraterone	AR-SV
1	DTB-003	Death	1	1499	Naive	NA	Visceral	0	3.4	186	56	14.7	Naïve	TRUE
2	DTB-005	Death	1	1082	Naive	NA	Non_visceral	0	13.6	204	102	13.7	Naïve	TRUE
3	DTB-008	Death	1	1287	Naive	NA	Non_visceral	0	251	150	252	10.6	Naïve	FALSE
4	DTB-009	Death	1	455	Naive	NA	Non_visceral	0	744	376	926	10.6	Resistant	TRUE
5	DTB-011	Last Contact	0	2092	Naive	NA	Non_visceral	1	28.74	198	67	11.9	Naïve	FALSE
6	DTB-018	Death	1	2508	Naive	NA	Non_visceral	0	69.4	156	76	10.8	Naïve	TRUE
7	DTB-019	Death	1	1031	Naive	NA	Non_visceral	0	47.7	155	95	13.3	Resistant	FALSE
8	DTB-020	Death	1	572	Resistant	75	Visceral	3	394	856	108	8	Resistant	FALSE
9	DTB-021	Last Contact	0	1680	Naive	NA	Non_visceral	0	54.24	204	76	13.8	Naïve	FALSE
10	DTB-022	Death	1	1281	Naive	NA	Visceral	1	7.28	184	86	12.4	Naïve	FALSE
11	DTB-023	Last Contact	0	2125	Resistant	1086	Non_visceral	0	7.25	NA	60	12.2	Resistant	TRUE
12	DTB-024	Death	1	667	Naive	NA	Visceral	1	48.92	488	327	13.9	Resistant	FALSE
13	DTB-034	Death	1	1523	Naive	NA	Non_visceral	0	154.3	170	77	12.8	Resistant	FALSE
14	DTB-035	Death	1	910	Naive	NA	Non_visceral	1	35.3	188	101	10.7	Resistant	FALSE
15	DTB-036	Death	1	267	Naive	NA	Visceral	0	37.2	197	104	12.5	Resistant	FALSE
16	DTB-037	Death	1	1707	Resistant	Unk	Visceral	1	447.2	245	194	8.9	Resistant	FALSE
17	DTB-040	Death	1	213	Naive	NA	Visceral	1	0.38	803	188	14.4	Naïve	FALSE
18	DTB-042	Death	1	1244	Naive	NA	Non_visceral	1	110.69	195	153	10.4	Resistant	FALSE
19	DTB-053	Death	1	402	Naive	NA	Visceral	2	88.5	336	176	9.4	Resistant	FALSE
20	DTB-055	Death	1	1081	Resistant	Unk	Non_visceral	1	60.5	203	85	12.4	Resistant	FALSE
21	DTB-059	Death	1	2614	Naive	NA	Visceral	1	1500	546	323	9.1	Resistant	FALSE
22	DTB-060	Death	1	1833	Naive	NA	Visceral	1	102.45	NA	64	11.1	Naïve	FALSE
23	DTB-061	Death	1	285	Resistant	30	Visceral	2	37	643	140	8.4	Resistant	FALSE
24	DTB-063	Last Contact	0	2027	Naive	NA	Non_visceral	0	20.9	183	68	14.6	Naïve	TRUE
25	DTB-064	Last Contact	0	NA	Naive	NA	Non_visceral	1	19.32	NA	91	12.2	Resistant	FALSE
26	DTB-067	Death	1	1507	Naive	NA	Non_visceral	1	3.2	277	461	11.3	Resistant	FALSE
27	DTB-069	Death	1	1113	Resistant	120	Visceral	1	375	291	65	13	Naïve	TRUE
28	DTB-071	Death	1	267	Naive	NA	Non_visceral	0	163	132	83	9.8	Naïve	FALSE
29	DTB-074	Death	1	3257	Naive	NA	Non_visceral	1	66.74	207	78	12.6	Resistant	FALSE
30	DTB-077	Last Contact	0	1315	Resistant	Unk	Non_visceral	0	13.47	144	93	14.8	Naïve	FALSE
31	DTB-080	Death	1	600	Naive	NA	Non_visceral	1	14.92	116	56	11.3	Naïve	FALSE
32	DTB-083	Death	1	1741	Resistant	92	Non_visceral	1	110	167	128	10.7	Resistant	FALSE
33	DTB-085	Death	1	1267	Resistant	231	Non_visceral	1	179	425	228	11.6	Resistant	FALSE
34	DTB-089	Death	1	1047	Naive	NA	Visceral	0	14.27	127	65	13.8	Resistant	TRUE
35	DTB-090	Last Contact	0	2236	Resistant	469	Non_visceral	1	30.4	195	78	11.8	Naïve	TRUE
36	DTB-091	Death	1	254	Naive	NA	Visceral	0	1188.19	182	95	12.9	Naïve	FALSE
37	DTB-092	Death	1	954	Naive	NA	Non_visceral	0	17.56	214	69	12.6	Resistant	TRUE
38	DTB-094	Death	1	2351	Naive	NA	Non_visceral	0	28.28	123	75	12.5	Resistant	TRUE
39	DTB-097	Death	1	343	Resistant	101	Non_visceral	0	25.68	381	164	11.7	Resistant	FALSE
40	DTB-098	Death	1	979	Naive	NA	Non_visceral	1	148.39	179	59	13.1	Naïve	FALSE
41	DTB-100	Death	1	2494	Resistant	135	Non_visceral	1	464	145	65	10.3	Resistant	FALSE
42	DTB-101	Death	1	2670	Naive	NA	Non_visceral	1	147.9	125	136	12.8	Resistant	TRUE
43	DTB-102	Death	1	1820	Resistant	Unk	Visceral	0	1210.48	266	64	11.8	Resistant	TRUE
44	DTB-104	Death	1	2032	Resistant	606	Visceral	0	20	195	62	10.9	Resistant	TRUE
45	DTB-111	Death	1	1496	Resistant	Unk	Non_visceral	0	35.02	180	56	13.4	Resistant	FALSE
46	DTB-112	Last contact	0	3045	Naive	NA	Non_visceral	0	184	453	94	12.4	Resistant	FALSE
47	DTB-119	Death	1	NA	Resistant	Unk	Non_visceral	1	0.6	205	403	10.8	Resistant	FALSE
48	DTB-121	Death	1	733	Resistant	190	Visceral	1	11.2	142	93	15.1	Naïve	FALSE
49	DTB-124	Death	1	512	Resistant	141	Non_visceral	0	26.8	389	317	13.2	Naïve	TRUE
50	DTB-126	Death	1	387	Resistant	221	Non_visceral	1	113	198	64	11.8	Resistant	FALSE
51	DTB-127	Death	1	908	Resistant	Unk	Non_visceral	1	228	165	89	12.2	Resistant	FALSE
52	DTB-128	Last contact	0	950	Naive	NA	Non_visceral	1	286.1	175	264	14	Naïve	FALSE
53	DTB-129	Death	1	718	Naive	NA	Non_visceral	1	8.21	176	129	13.4	Naïve	FALSE
54	DTB-132	Last contact	0	1249	Naive	NA	Non_visceral	1	371.76	150	66	13.8	Naïve	FALSE
55	DTB-135	Death	1	236	Resistant	Unk	Non_visceral	1	9.19	582	107	11.6	Naïve	FALSE
56	DTB-137	Death	1	771	Resistant	Unk	Non_visceral	1	539.62	236	226	11.4	Naïve	FALSE
57	DTB-138	Death	1	NA	Resistant	257	Visceral	0	102	297	78	12.5	Naïve	FALSE
58	DTB-140	Death	1	619	Naive	NA	Visceral	1	388.62	255	885	13.3	Resistant	FALSE
59	DTB-141	Death	1	860	Naive	NA	Non_visceral	1	140.07	214	390	13.3	Naïve	TRUE
60	DTB-143	Last contact	0	1068	Naive	NA	Non_visceral	0	94.42	188	75	13.6	Naïve	TRUE
61	DTB-146	Death	1	1342	Naive	NA	Non_visceral	0	34.79	207	54	14.5	Resistant	FALSE
62	DTB-149	Death	1	498	Naive	NA	Non_visceral	0	16.45	233	195	13.2	Naïve	FALSE
63	DTB-151	Death	1	700	Naive	NA	Visceral	0	16.55	162	96	13.7	Naïve	FALSE
64	DTB-156	Death	1	493	Naive	NA	Non_visceral	1	929.9	507	1506	12.8	Resistant	FALSE
65	DTB-159	Last contact	0	1904	Naive	NA	Visceral	0	3.36	280	78	14.5	Naïve	FALSE
66	DTB-165	Death	1	807	Resistant	Unk	Non_visceral	0	13.5	203	47	13.8	Naïve	TRUE
67	DTB-167	Last contact	0	2028	NA	NA	Non_visceral	0	136.64	179	56	12.7	NA	FALSE
68	DTB-170	Last contact	0	217	Naive	NA	Non_visceral	0	91.4	140	62	14.7	Resistant	FALSE
69	DTB-172	Death	1	580	Resistant	348	Visceral	1	7.96	124.1	78	14.5	Resistant	FALSE
70	DTB-173	Last contact	0	1223	Naive	NA	Non_visceral	0	313.4	130	91	15.7	Resistant	FALSE
71	DTB-175	Death	1	941	Resistant	243	Visceral	1	65.581	366	105	8.2	Resistant	TRUE
72	DTB-176	Last contact	0	1106	Naive	NA	Visceral	0	3.57	182	63	13.6	Naïve	TRUE
73	DTB-183	Death	1	935	Naive	NA	Non_visceral	1	908.21	NA	57	13	Naïve	FALSE
74	DTB-186	Death	1	1278	Resistant	161	Non_visceral	1	115.6	151	126	13.9	Resistant	TRUE
75	DTB-187	Last contact	0	1043	Naive	NA	Non_visceral	0	19.5	185	104	13.6	Naïve	FALSE
76	DTB-188	Death	1	2593	Resistant	728	Non_visceral	0	39.2	164	146	12.2	Resistant	TRUE
77	DTB-190	Last contact	0	2235	Naive	NA	Non_visceral	0	1.84	178	68	13.8	Resistant	FALSE
78	DTB-193	Last contact	0	1621	Resistant	237	Non_visceral	0	32.22	191	77	12.5	Resistant	FALSE
79	DTB-194	Death	1	1406	Resistant	Unk	Non_visceral	0	103.55	190	138	14.1	Naïve	FALSE
80	DTB-201	Death	1	482	Resistant	Unk	Visceral	1	310.95	224	92	10.6	Naïve	TRUE
81	DTB-202	Death	1	354	Naive	NA	Visceral	0	102.78	410	269	13.6	Resistant	FALSE
82	DTB-204	Last contact	0	841	Naive	NA	Non_visceral	0	83	206	135	12.7	Naïve	FALSE
83	DTB-205	Last contact	0	1614	Naive	NA	Non_visceral	0	1.48	185	51	12.9	Naïve	FALSE
84	DTB-206	Death	1	469	Naive	NA	Visceral	0	24.8	158	59	14.6	Naïve	FALSE
85	DTB-210	Death	1	362	Naive	NA	Non_visceral	0	70.45	31	736	13.5	Naïve	FALSE
86	DTB-213	Last contact	0	715	Resistant	535	Non_visceral	0	4.15	156	62	10.6	Naïve	FALSE
87	DTB-214	Death	1	304	Naive	NA	Non_visceral	0	527.18	303	381	8.2	Naïve	FALSE
88	DTB-216	Death	1	461	Resistant	Unk	Non_visceral	0	3.117	274	387	13.2	Naïve	FALSE
89	DTB-220	Death	1	374	Naive	NA	Non_visceral	0	55.739	133	64	12.6	Resistant	FALSE
90	DTB-222	Death	1	1259	Naive	NA	Non_visceral	0	390	184	106	11.9	Resistant	FALSE
91	DTB-223	Last contact	0	590	Naive	NA	Non_visceral	0	4.26	178	72	15	Naïve	FALSE
92	DTB-232	Last contact	0	478	Resistant	Unk	Non_visceral	0	5.31	NA	92	12	Naïve	FALSE
93	DTB-234	Death	1	1799	Naive	NA	Non_visceral	0	12.4	185	52	12.8	Resistant	FALSE
94	DTB-251	Last contact	0	343	Naive	NA	Non_visceral	0	2.804	181	62	15.7	Naïve	FALSE
95	DTB-252	Last contact	0	491	Naive	NA	Non_visceral	1	31.29	257	52	14.4	Naïve	FALSE
96	DTB-255	Last contact	0	543	Naive	NA	Non_visceral	0	32.19	145	78	12.6	Naïve	FALSE
97	DTB-258	Last contact	0	1232	Naive	NA	Non_visceral	0	30.03	207	158	13.7	Naïve	FALSE
98	DTB-260	Last contact	0	476	Naive	NA	Non_visceral	1	6.83	189	91	12.1	Naïve	FALSE
99	DTB-261	Last contact	0	406	Naive	NA	Non_visceral	1	64.7	143	56	13.2	Naïve	FALSE
100	DTB-265	Last contact	0	266	Resistant	Unk	Non_visceral	0	42.93	203	57	12.5	Naïve	FALSE
101	DTB-266	Last contact	0	645	Naive	NA	Non_visceral	0	31	134	114	11.2	Naïve	FALSE
